# Supplementary material
Source: PubMed Central journal article supplement (PMC9184236)
Supplement: NIHMS1812841-supplement-Supporting_Information.pdf [file NIHMS1812841-supplement-Supporting_Information.pdf]

*Supporting information for*

## **Coupling a Live Cell Directed Evolution Assay with Coevolutionary Landscapes to Engineer an Improved Fluorescent Rhodopsin Chloride Sensor**

Hsichuan Chi<sup>†‡§</sup>, Qin Zhou<sup>‡§</sup>, Jasmine N. Tutol<sup>†§</sup>, Shelby M. Phelps<sup>†§</sup>, Jessica Lee<sup>†‡</sup>, Parth Kapadia<sup>‡</sup>, Faruck Morcos<sup>‡^\*</sup>, Sheel C. Dodani<sup>†\*</sup>

Departments of <sup>†</sup>Chemistry and Biochemistry, <sup>‡</sup>Biological Sciences, and <sup>^</sup>Bioengineering, The University of Texas at Dallas, Richardson, TX 75080

<sup>§</sup>H.C., Q.Z., J.N.T., and S.M.P. contributed equally to this work.

\*sheel.dodani@utdallas.edu, \*faruckm@utdallas.edu



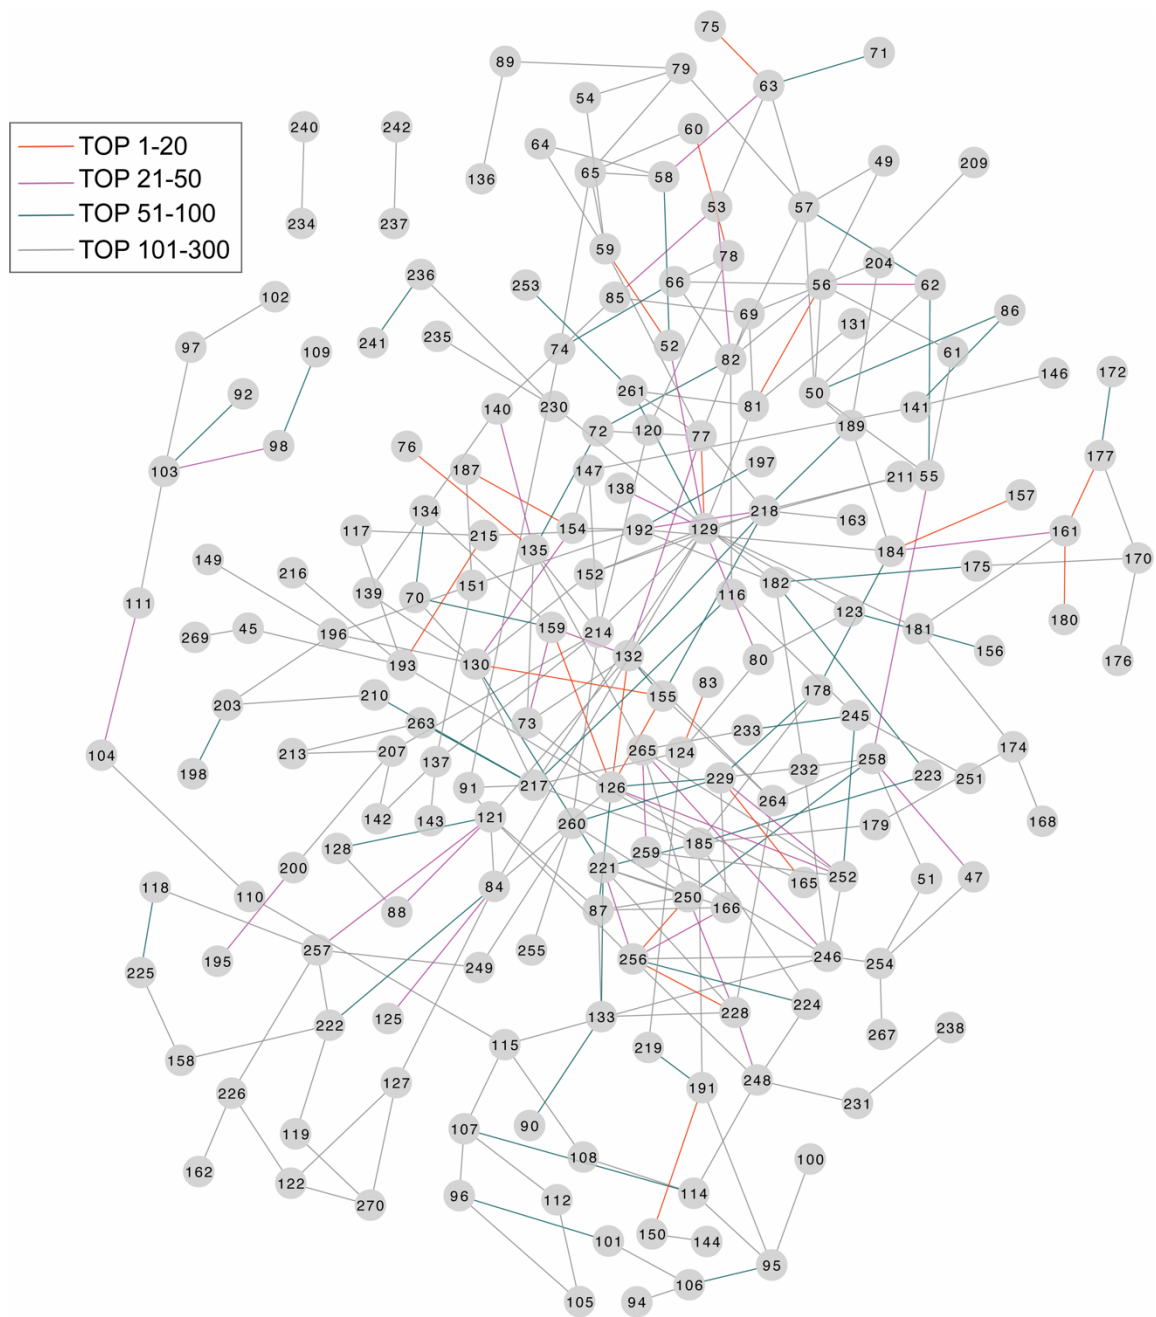

**Figure S2.** Connectivity map for the top 300 direct information (DI) pairs. Residues that maintain strong direct evolutionary couplings are shown in the map with position numbers mapped to *wtGR* in gray circles. Each DI pair is linked with a line. The colors of the lines represent the rank of the strength of the couplings for the DI pairs.

**Supplemental File 1.** Table of the top 300 DI pairs.

**Table S1.** Distances for the top DI pairs for the selected proton-pumping pathway residues. The shortest distances between the sidechains are reported.

| Residue | Amino acid | Paired residue | Amino acid | Distance (Å) |
|---------|------------|----------------|------------|--------------|
| 84      | ALA        | 121            | VAL        | 5.2          |
|         |            | 125            | THR        | 4.6          |
|         |            | 126            | VAL        | 8.9          |
|         |            | 127            | PRO        | 11.3         |
|         |            | 129            | LEU        | 8.4          |
|         |            | 222            | TRP        | 12.9         |
| 121     | VAL        | 88             | TYR        | 5.6          |
|         |            | 84             | ALA        | 5.2          |
|         |            | 91             | ILE        | 4.8          |
|         |            | 87             | HIS        | 2.9          |
|         |            | 128            | LEU        | 7.5          |
|         |            | 132            | GLU        | 11.3         |
|         |            | 256            | ALA        | 10.1         |
|         |            | 257            | LYS        | 5.7          |
| 125     | THR        | 84             | ALA        | 4.6          |
| 132     | GLU        | 73             | ALA        | 4.1          |
|         |            | 77             | SER        | 2.8          |
|         |            | 121            | VAL        | 11.3         |
|         |            | 126            | VAL        | 6.9          |
|         |            | 155            | SER        | 11.0         |
|         |            | 159            | ILE        | 14.5         |
|         |            | 218            | LEU        | 9.4          |
|         |            | 264            | VAL        | 3.8          |
| 245     | VAL        | 116            | ALA        | 11.2         |
|         |            | 233            | MET        | 8.8          |
|         |            | 251            | ILE        | 7.0          |
|         |            | 252            | ALA        | 7.8          |
| 261     | GLY        | 77             | SER        | 4.4          |
|         |            | 81             | VAL        | 8.3          |
|         |            | 129            | LEU        | 6.9          |
|         |            | 253            | ASP        | 8.2          |

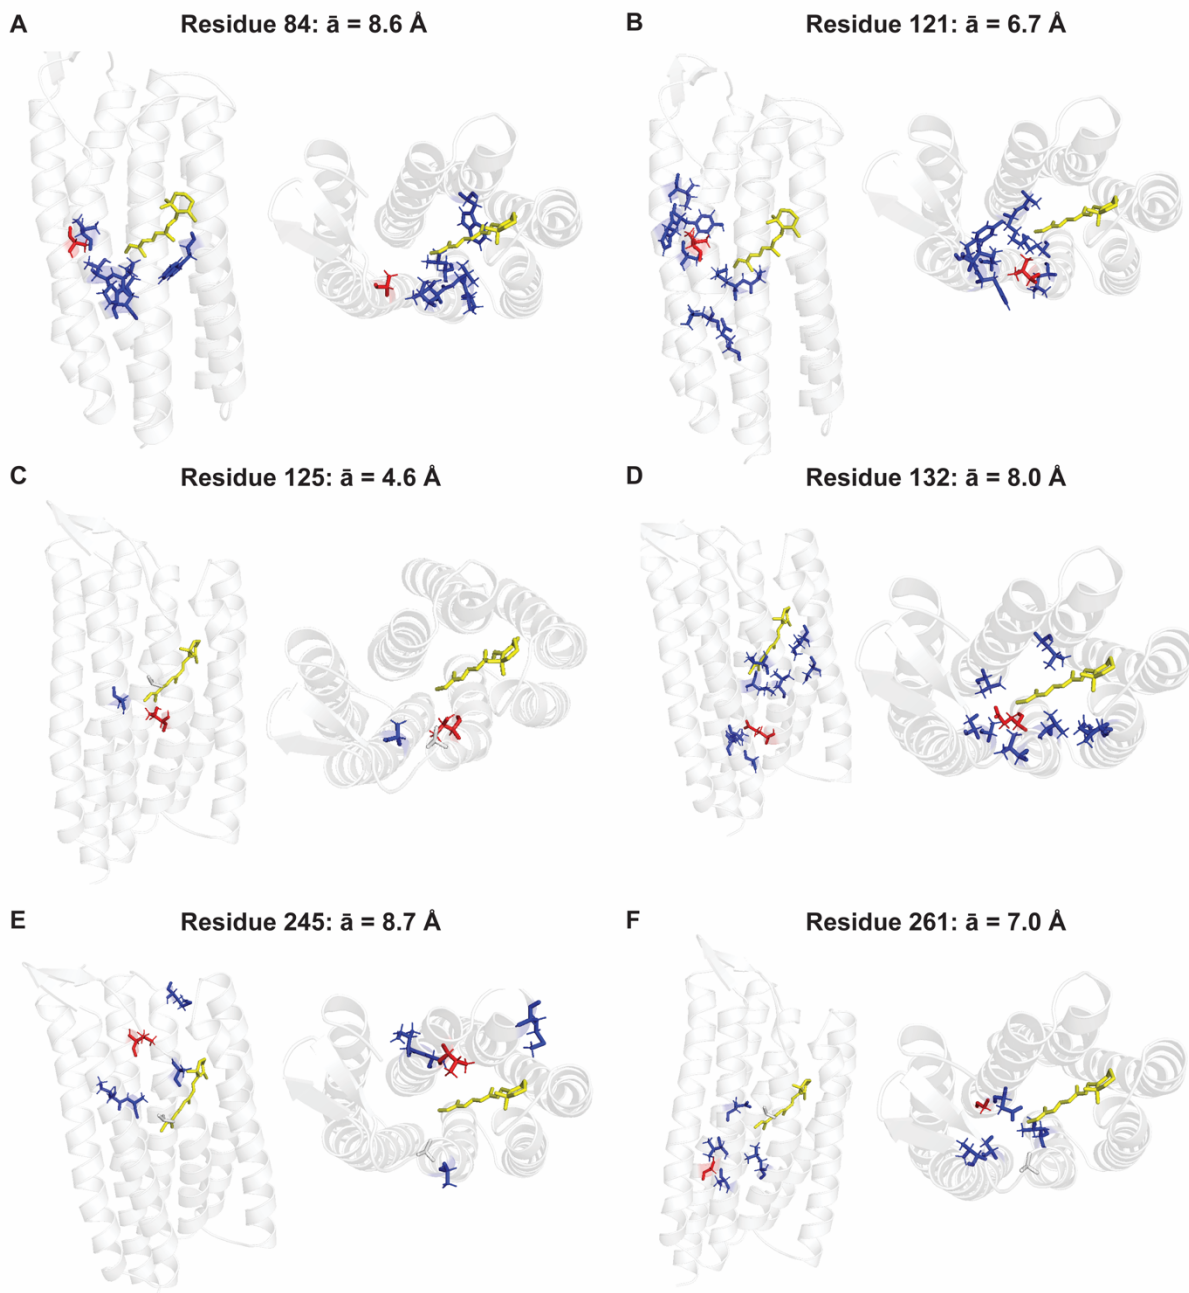

**Figure S3.** (A–F) Comparison of the residues along the proton-pumping pathway (red sticks) with the corresponding coevolved residues (blue sticks) for the top DCA pairs shown in Figure 2. In each panel, the side (left) and top (right) views are shown for the homology model of the rhodopsin chloride sensor GR1 only with the Schiff base chromophore (yellow sticks). The average distances ( $\bar{a}$ ) from the selected residues along the proton-pumping pathway (red sticks) to the corresponding coevolved residues (blue sticks) are listed in Table S1.

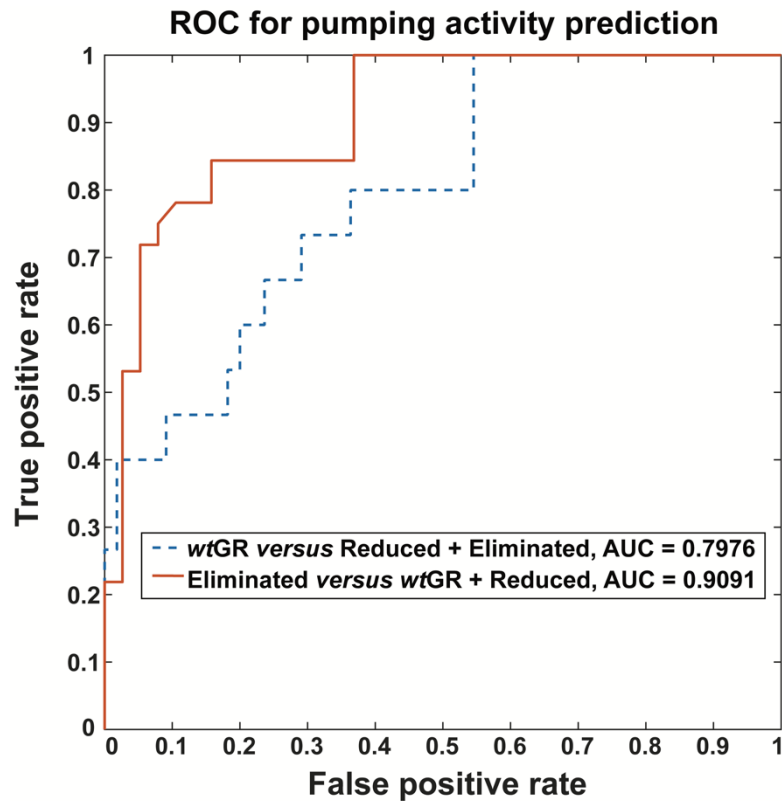

**Figure S4.** Receiver operating characteristic (ROC) curve for the Hamiltonian score prediction. Based on the proton-pumping activity, two one-vs.-rest (OVR) classifiers were used to create the ROC curve: *wtGR*-like (*wtGR*-like versus Reduced + Eliminated) and eliminated (Eliminated versus *wtGR*-like + Reduced). For the *wtGR*-like classifier, the curve is shown as a blue dashed line. The area under this ROC curve is 0.7976. For the eliminated classifier, the curve is shown as a solid red line. The area under this ROC curve is 0.9091.

**Table S2.** List of the primers used to generate the site-saturation mutagenesis (SSM) library at each position. The mutation site is in red.

| Description     | Primer (5' to 3')                               |
|-----------------|-------------------------------------------------|
| 132 SSM Forward | GTGCCTCTGTTGCTGGTGN <b>NDT</b> ACAGTGGCAGTGCTGA |
|                 | GTGCCTCTGTTGCTGGTGV <b>HG</b> ACAGTGGCAGTGCTGA  |
|                 | GTGCCTCTGTTGCTGGTGT <b>GG</b> ACAGTGGCAGTGCTGA  |
| 132 SSM Reverse | CACCAGCAACAGAGGCACGGTCAACAGCCAAACC              |
| 84 SSM Forward  | GCAATTGTTGTGAGTATC <b>NDT</b> GGGTACCACTACTTTC  |
|                 | GCAATTGTTGTGAGTATCV <b>HG</b> GGGTACCACTACTTTC  |
|                 | GCAATTGTTGTGAGTATCT <b>GG</b> GGGTACCACTACTTTC  |
| 84 SSM Reverse  | GATACTCACAACAATTGCTGAAACAAGCAAGGCC              |
| 125 SSM Forward | TATGTGGTTTGGCTGTTG <b>NDT</b> GTGCCTCTGTTGCTGG  |
|                 | TATGTGGTTTGGCTGTTGV <b>HG</b> GGTGCCTCTGTTGCTGG |
|                 | TATGTGGTTTGGCTGTTGT <b>GG</b> GGTGCCTCTGTTGCTGG |
| 125 SSM Reverse | CAACAGCCAAACCACATAGCGGTAGGCGTCGTTG              |
| 245 SSM Forward | ACGTCCGCGGCTGTCGGC <b>NDT</b> CAGGTTGGCTATACGA  |
|                 | ACGTCCGCGGCTGTCGGCV <b>HG</b> CAGGTTGGCTATACGA  |
|                 | ACGTCCGCGGCTGTCGGCT <b>GG</b> CAGGTTGGCTATACGA  |
| 245 SSM Reverse | GCCGACAGCCGCGGACGTACCGGATACTCCAAGC              |
| 261 SSM Forward | CTGGCGAAGCCTGTATTT <b>NDT</b> CTTCTAGTCTTCGCGA  |
|                 | CTGGCGAAGCCTGTATTT <b>VHG</b> CTTCTAGTCTTCGCGA  |
|                 | CTGGCGAAGCCTGTATTT <b>TGG</b> CTTCTAGTCTTCGCGA  |
| 261 SSM Reverse | AAATACAGGCTTCGCCAGCACGTCTGCGATCGTA              |



CATATGTTGATGACCGTATTTTCTTCTGCACCTGAACTTGCCCTTCTCGGATCAACCTTTGC  
 CCAGGTCGATCCTTCAAACCTTATCGGTCTCAGATTCGCTGACCTATGGTCAGTTCAATCTG  
 GTTTACAACGCTTTCTCGTTTGCCATCGCGGCAATGTTTCGCATCTGCCCTTCTTCTTTCAG  
 CGCTCAGGCACTCGTCGGTCAACGATACCGGTTGGCCTTGCTTGTTTCAGCAATTGTTGTG  
 AGTATCAAGGGGTACCACTACTTTTCGGATCTTCAATAGTTGGGATGCTGCCTACGTTCTGG  
 AGAATGGCGTGTATTCCCTGACTAGCGAAAAATTCAACGACGCCTACCGCTATGTGGTTTG  
 GCTGTTGTGTGTGCCTCTGTTGCTGGTGAAGACAGTGGCAGTGCTGACGTTGCCTGCAA  
 GGAGGCAAGACCCTTGCTGATCAAACCTGACGGTGGCTTCAGTTCTGATGATTGCCACGGG  
 CTACCCCGGCGAGATTTCTGACGACATTACGACTCGCATCATCTGGGGTACGGTCAGCAC  
 GATTCCCTTCGCCTACATCCTCTATGTGTTGTGGGTGCGAACTGTCCAGGTCCCTTGTCCGC  
 CAGCCCGCTGCTGTACAAACCCTGGTCCGCAACATGCGGTGGCTGCTGTTGCTCTCCTGG  
 GGTGTTTACCCGATCGCATACCTTCTACCCATGCTTGGAGTATCCGGTACGTCCGCGGGCT  
 GTCGGCATTAGGTTGGCTATACGATCGCAGACGTGCTGGCGAAGCCTGTATTTGGTCTT  
 CTAGTCTTCGCGATTGCACTCGTGAAAACAAAAGCAGATCAAGAAAGCAGTGAACCACATG  
 CCGCAATAGGTGCTGCTGCAAATAAATCGGGAGGCAGTCTTATCTCCCGCGCCGCAATGG  
 TGAGCAAGGGCGAGGAGCTGTTACCGGGGTGGTGCCCATCCTGGTTCGAGCTGGACGGC  
 GACGTAACGGCCACAAGTTCAGCGTGTCCGGCGAGGGCGAGGGCGATGCCACCTACGG  
 CAAGCTGACCCTGAAGTTCATCTGCACCACCGGCAAGCTGCCCGTGCCCTGGCCACCCT  
 CGTGACCACCCTGACCTGGGGCGTGCAGTGCTTCAGCCGCTACCCCGACCACATGAAGC  
 AGCAGACTTCTTCAAGTCCGCCATGCCCGAAGGCTACGTCCAGGAGCGCACCATCTTCT  
 TCAAGGACGACGGCAACTACAAGACCCGCGCCGAGGTGAAGTTCGAGGGGCGACACCCTG  
 GTGAACCGCATCGAGCTGAAGGGCATCGACTTCAAGGAGGACGGCAACATCCTGGGGCA  
 CAAGCTGGAGTACAACCTACATCAGCCACAACGTCTATATCACCGCCGACAAGCAGAAGAAC  
 GGCATCAAGGCCAACTTCAAGATCCGCCACAACATCGAGGACGGCAGCGTGCAGCTCGC  
 CGACCACTACCAGCAGAACACCCCCATCGGCGACGGCCCCGTGCTGCTGCCCCGACAACC  
 ACTACCTGAGCACCCAGTCCGCCCTGAGCAAAGACCCCAACGAGAAGCGCGATCACATGG  
 TCCTGCTGGAGTTCGTGACCGCCGCCCTCGAGCACACCACCACCACCTGA

**Figure S5.** Nucleotide sequence encoding GR2-CFP in the pET-21a(+) vector. The following regions are highlighted: restriction sites and the A nucleotide (orange), GR2 (black), mutation sites in GR2 (red), CFP (blue), His-tag (purple), and stop codon (green).

Met Leu Met Thr Val Phe Ser Ser Ala Pro Glu Leu Ala Leu Leu Gly Ser Thr Phe Ala 20  
 Gln Val Asp Pro Ser Asn Leu Ser Val Ser Asp Ser Leu Thr Tyr Gly Gln Phe Asn Leu 40  
 Val Tyr Asn Ala Phe Ser Phe Ala Ile Ala Ala Met Phe Ala Ser Ala Leu Phe Phe 60  
 Ser Ala Gln Ala Leu Val Gly Gln Arg Tyr Arg Leu Ala Leu Leu Val Ser Ala Ile Val 80  
 Val Ser Ile Lys Gly Tyr His Tyr Phe Arg Ile Phe Asn Ser Trp Asp Ala Ala Tyr Val 100  
 Leu Glu Asn Gly Val Tyr Ser Leu Thr Ser Glu Lys Phe Asn Asp Ala Tyr Arg Tyr Val 120  
 Val Trp Leu Leu Cys Val Pro Leu Leu Leu Val Lys Thr Val Ala Val Leu Thr Leu Pro 140  
 Ala Lys Glu Ala Arg Pro Leu Leu Ile Lys Leu Thr Val Ala Ser Val Leu Met Ile Ala 160  
 Thr Gly Tyr Pro Gly Glu Ile Ser Asp Asp Ile Thr Thr Arg Ile Ile Trp Gly Thr Val 180  
 Ser Thr Ile Pro Phe Ala Tyr Ile Leu Tyr Val Leu Trp Val Glu Leu Ser Arg Ser Leu 200  
 Val Arg Gln Pro Ala Ala Val Gln Thr Leu Val Arg Asn Met Arg Trp Leu Leu Ser Leu 220  
 Ser Trp Gly Val Tyr Pro Ile Ala Tyr Leu Leu Pro Met Leu Gly Val Ser Gly Thr Ser 240  
 Ala Ala Val Gly Ile Gln Val Gly Tyr Thr Ile Ala Asp Val Leu Ala Lys Pro Val Phe 260  
 Gly Leu Leu Val Phe Ala Ile Ala Leu Val Lys Thr Lys Ala Asp Gln Glu Ser Ser Glu 280  
 Pro His Ala Ala Ile Gly Ala Ala Ala Asn Lys Ser Gly Gly Ser Leu Ile Ser Ala Ala 300  
 Ala Met Val Ser Lys Gly Glu Glu Leu Phe Thr Gly Val Val Pro Ile Leu Val Glu Leu 320  
 Asp Gly Asp Val Asn Gly His Lys Phe Ser Val Ser Gly Glu Gly Glu Gly Asp Ala Thr 340  
 Tyr Gly Lys Leu Thr Leu Lys Phe Ile Cys Thr Thr Gly Lys Leu Pro Val Pro Trp Pro 360  
 Thr Leu Val Thr Thr Leu Thr Trp Gly Val Gln Cys Phe Ser Arg Tyr Pro Asp His Met 380  
 Lys Gln His Asp Phe Phe Lys Ser Ala Met Pro Glu Gly Tyr Val Gln Glu Arg Thr Ile 400  
 Phe Phe Lys Asp Asp Gly Asn Tyr Lys Thr Arg Ala Glu Val Lys Phe Glu Gly Asp Thr 420  
 Leu Val Asn Arg Ile Glu Leu Lys Gly Ile Asp Phe Lys Glu Asp Gly Asn Ile Leu Gly 440  
 His Lys Leu Glu Tyr Asn Tyr Ile Ser His Asn Val Tyr Ile Thr Ala Asp Lys Gln Lys 460  
 Asn Gly Ile Lys Ala Asn Phe Lys Ile Arg His Asn Ile Glu Asp Gly Ser Val Gln Leu 480  
 Ala Asp His Tyr Gln Gln Asn Thr Pro Ile Gly Asp Gly Pro Val Leu Leu Pro Asp Asn 500  
 His Tyr Leu Ser Thr Gln Ser Ala Leu Ser Lys Asp Pro Asn Glu Lys Arg Asp His Met 520  
 Val Leu Leu Glu Phe Val Thr Ala Ala Leu Glu His His His His His His End 538

**Figure S6.** Amino acid sequence of GR2-CFP. Colors correspond to the description in Figure S5.

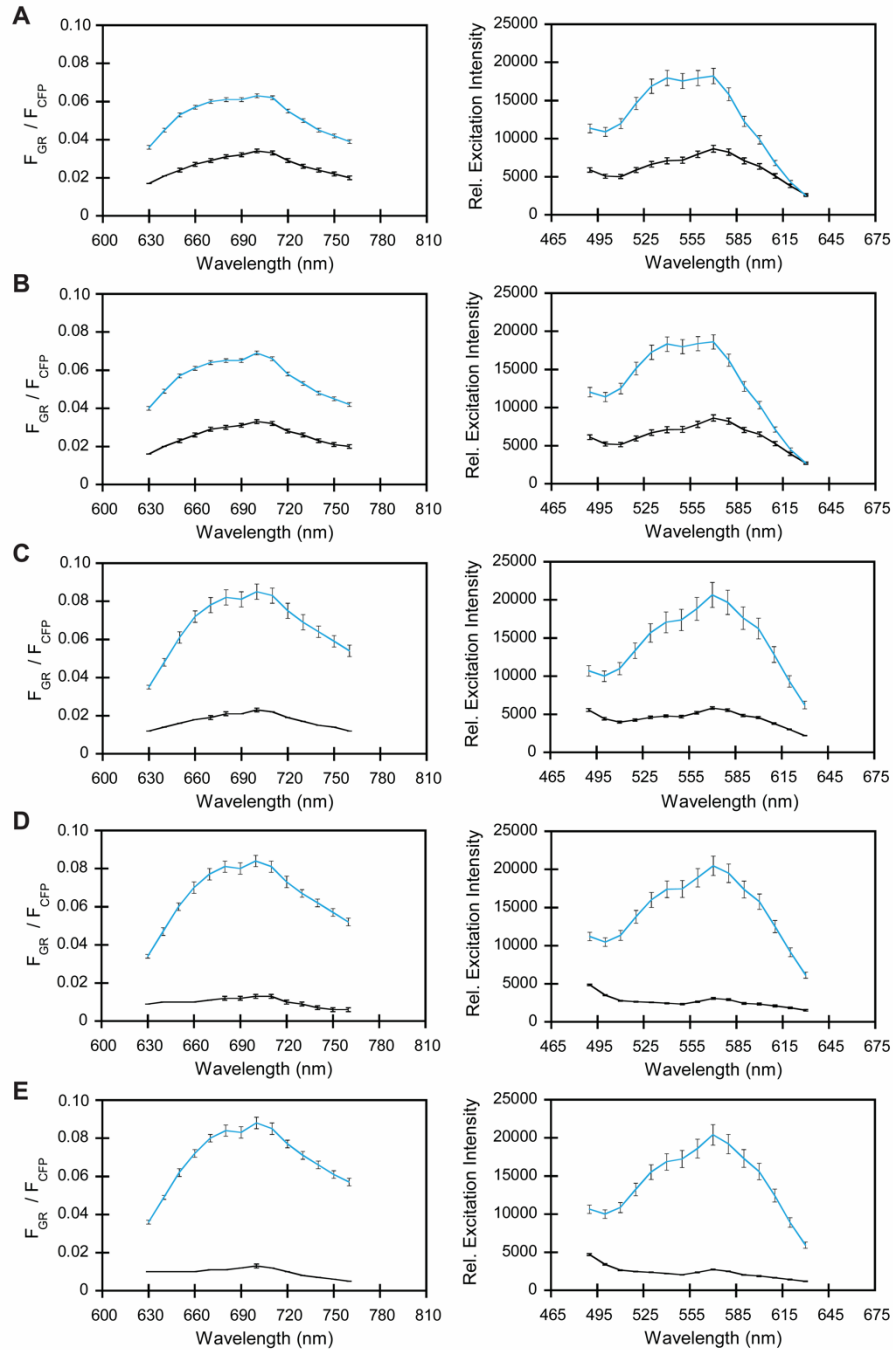

**Figure S7.** Characterization of the engineered GR1-CFP variants in *Escherichia coli* treated with 0 (black) and 400 mM (blue) sodium chloride in 50 mM sodium acetate buffer at pH 5. The emission spectra of the rhodopsin normalized by the CFP emission at 485 nm (left) and excitation spectra of the rhodopsin emission at 710 nm (right) are shown for (A) GR1-CFP, (B) GR1 E132K-CFP, (C) GR1 E132K/A84K-CFP, (D) GR1 E132K/A84K/T125C-CFP, and (E) GR2-CFP.

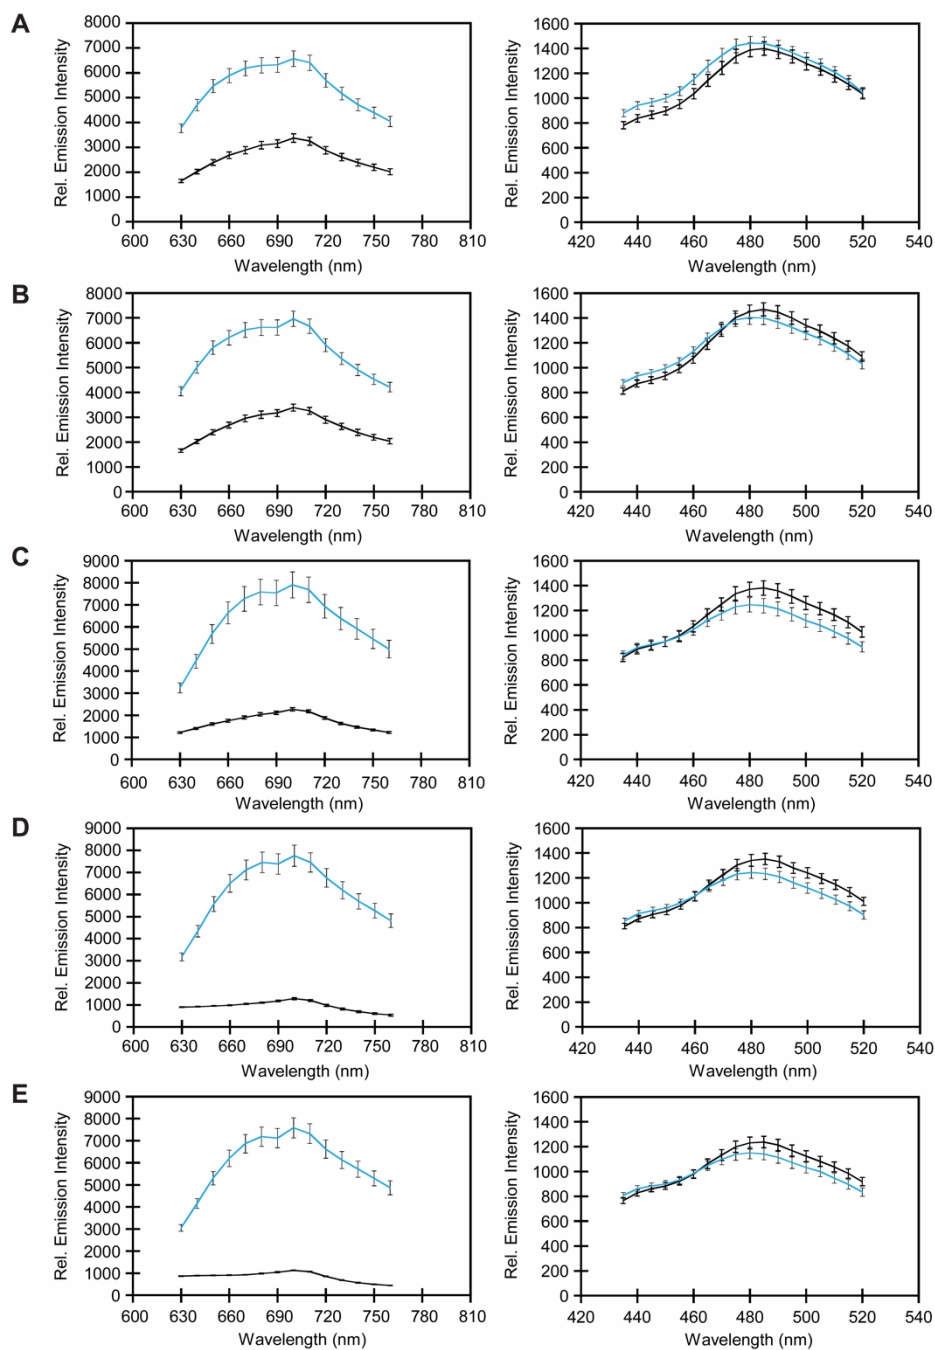

**Figure S8.** The emission spectra of the rhodopsin from 630–760 nm (left) and CFP from 435–520 nm (right) are shown for (A) GR1-CFP, (B) GR1 E132K-CFP, (C) GR1 E132K/A84K-CFP, (D) GR1 E132K/A84K/T125C-CFP, and (E) GR2-CFP from Figure S7.

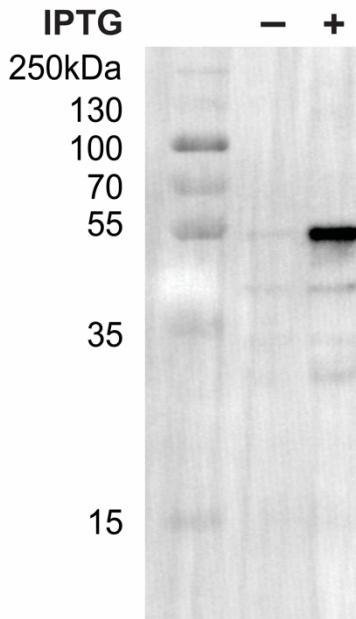

**Figure S9.** Representative western blot analysis using an anti-6x-His tag antibody shows that GR2-CFP is expressed in the isopropyl  $\beta$ -D-1-thiogalactopyranoside (IPTG) induced sample. The expected molecular weight for the monomer is ~59.3 kDa.

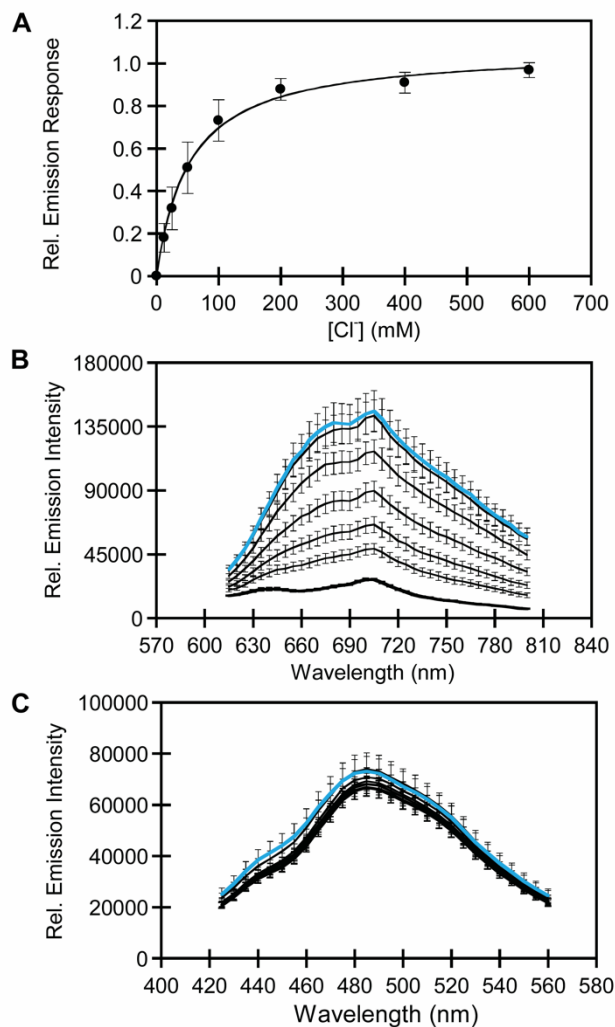

**Figure S10.** (A) Normalized integrated emission response ( $F_{GR2}/F_{CFP}$ ) of GR2-CFP expressed in *E. coli* to 0, 12.5, 25, 50, 100, 200, 400, and 600 mM sodium chloride in 50 mM sodium acetate buffer at pH 5 to determine the apparent dissociation constant ( $K_d$ ) from Figure 4A. Note: the additional data point for 600 mM sodium chloride is not shown in Figure 4A. The  $K_d$  for Cl<sup>-</sup> is  $53 \pm 14$  mM. (B) Emission spectra of GR2 for GR2-CFP from Figure 4A. (C) Emission spectra of CFP for GR2-CFP from Figure 4A. For the rhodopsin, excitation was provided at 570 nm, and the emission was collected and integrated from 615–800 nm ( $F_{GR2}$ ). For CFP, excitation was provided at 390 nm, and the emission was collected from 425–560 nm. The emission spectra of GR2 at each point were normalized by the CFP emission intensity at 485 nm ( $F_{CFP}$ ). The average of nine biological replicates from three technical replicates with standard error of the mean is shown.

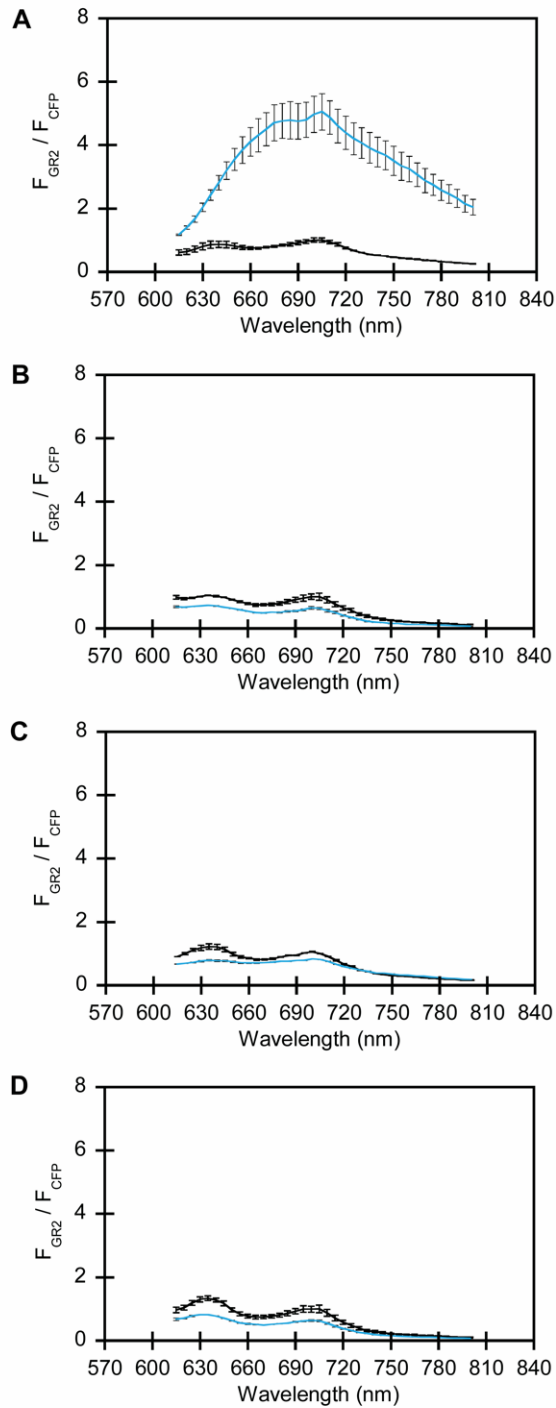

**Figure S11.** Normalized emission spectra of GR2-CFP in *E. coli* treated with 0 (black) or 400 mM (blue) sodium chloride in 50 mM sodium acetate buffer at pH 5 following expression (A) with IPTG and all-*trans*-retinal (ATR), (B) with IPTG only, (C) with ATR only, and (D) without IPTG and ATR. For the rhodopsin, excitation was provided at 570 nm, and the emission was collected from 615–800 nm. For CFP, the excitation was provided at 390 nm, and the emission was collected from 425–560 nm. The emission spectra of GR2 at each point were normalized by the CFP emission intensity at 485 nm ( $F_{\text{CFP}}$ ). The average of nine biological replicates from three technical replicates with standard error of the mean is shown.

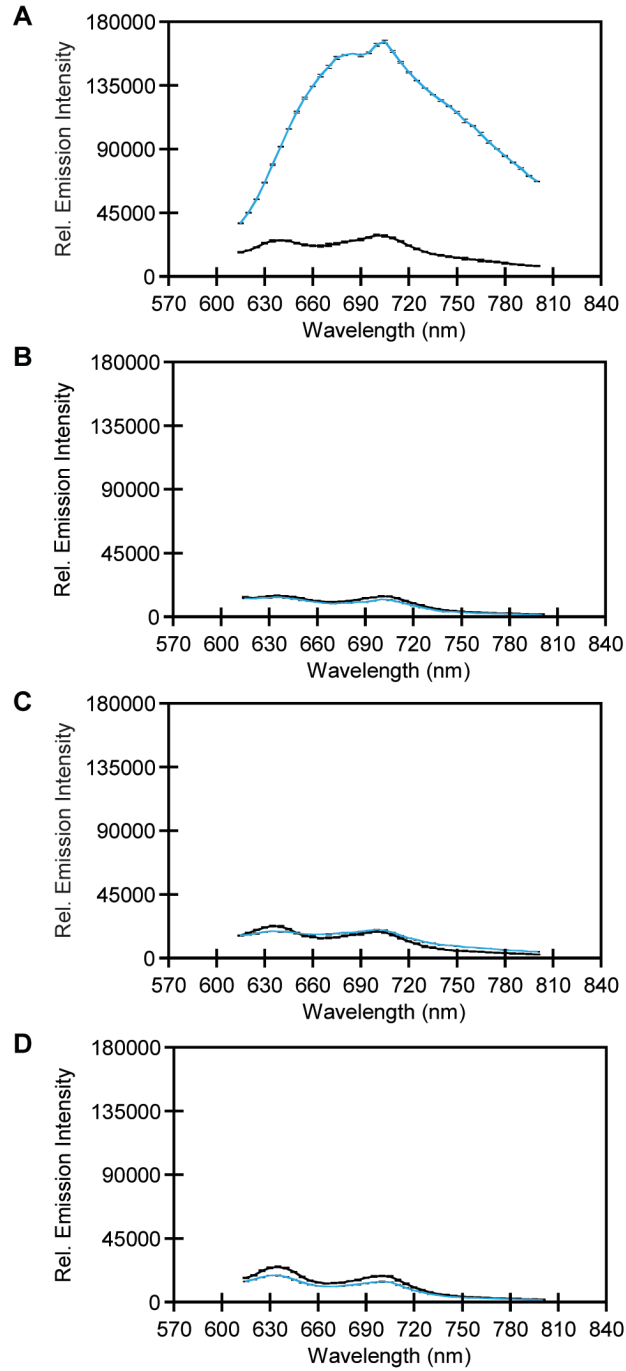

**Figure S12.** Emission spectra of GR2 for GR2-CFP in *E. coli* treated with 0 (black) or 400 mM (blue) sodium chloride following expression (A) with IPTG and ATR, (B) with IPTG only, (C) with ATR only, and (D) without IPTG and ATR from Figure S11.



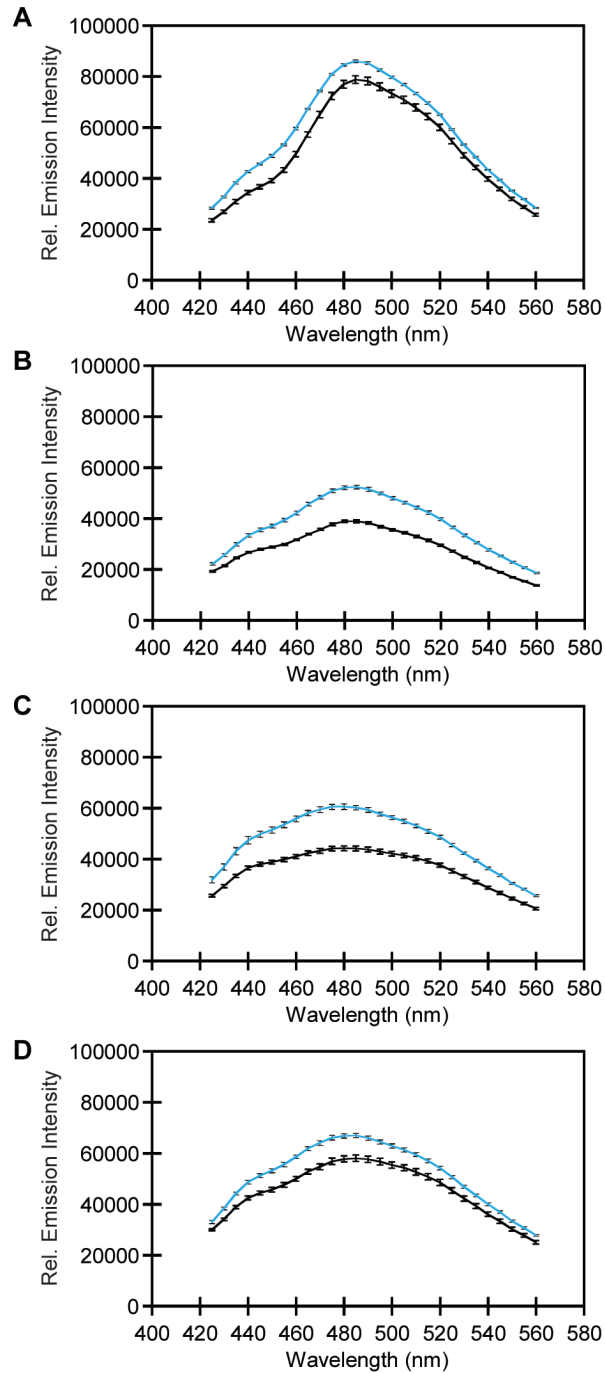

**Figure S13.** Emission spectra of CFP for GR2-CFP in *E. coli* treated with 0 (black) or 400 mM (blue) sodium chloride following expression (A) with IPTG and ATR, (B) with IPTG only, (C) with ATR only, and (D) without IPTG and ATR from Figure S11.

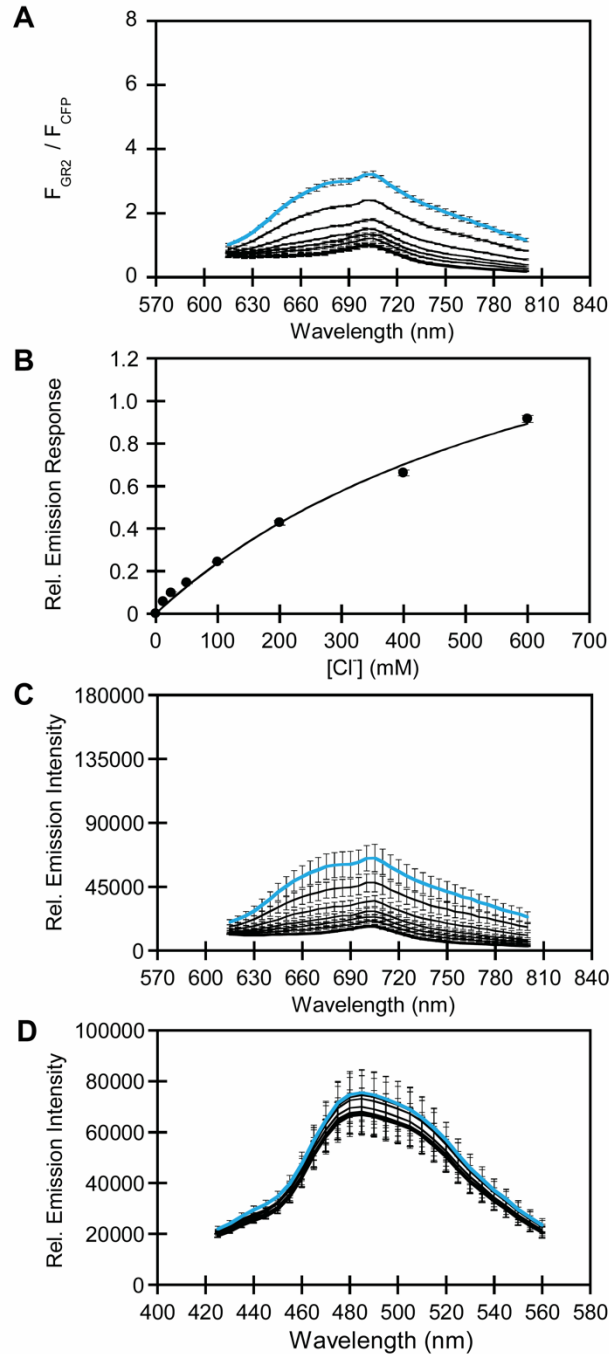

**Figure S14.** (A) Normalized emission spectra of GR2-CFP in *E. coli* treated with 0 (black and bold), 12.5, 25, 50, 100, 200, and 400 mM (blue) sodium chloride in 50 mM sodium phosphate buffer at pH 6. (B) Normalized integrated emission response ( $F_{GR2}/F_{CFP}$ ) from A to determine the  $K_d$ . Note: the additional data point for 600 mM sodium chloride is not shown in A. The  $K_d$  for Cl<sup>-</sup> is  $731 \pm 31$  mM. (C) Emission spectra of GR2 from A. (D) Emission spectra of CFP from A. For the rhodopsin, excitation was provided at 570 nm, and the emission was collected and integrated from 615–800 nm ( $F_{GR2}$ ). For CFP, excitation was provided at 390 nm, and the emission was collected from 425–560 nm ( $F_{CFP}$ ). The emission spectra of GR2 at each point were normalized by the CFP emission intensity at 485 nm ( $F_{CFP}$ ). The average of nine biological replicates from three technical replicates with standard error of the mean is shown.

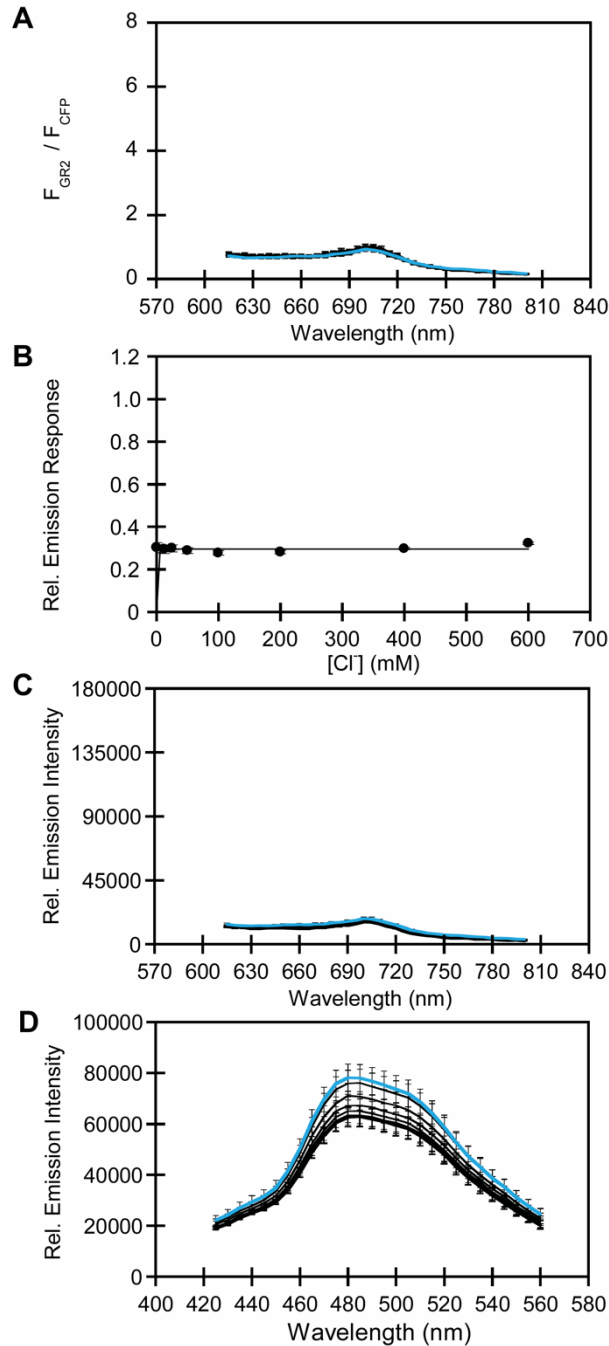

**Figure S15.** (A) Normalized emission spectra of GR2-CFP in *E. coli* treated with 0 (black and bold), 12.5, 25, 50, 100, 200, and 400 mM (blue) sodium chloride in 50 mM sodium phosphate buffer at pH 7. (B) Normalized integrated emission response ( $F_{GR2}/F_{CFP}$ ) from A. Note: the additional data point for 600 mM sodium chloride is not shown in A. The  $K_d$  could not be determined. (C) Emission spectra of GR2 from A. (D) Emission spectra of CFP from A. For the rhodopsin, excitation was provided at 570 nm, and the emission was collected and integrated from 615–800 nm ( $F_{GR2}$ ). For CFP, the excitation was provided at 390 nm, and the emission was collected from 425–560 nm ( $F_{CFP}$ ). The emission spectra of GR2 at each point were normalized by the CFP emission intensity at 485 nm ( $F_{CFP}$ ). The average of nine biological replicates from three technical replicates with standard error of the mean is shown.

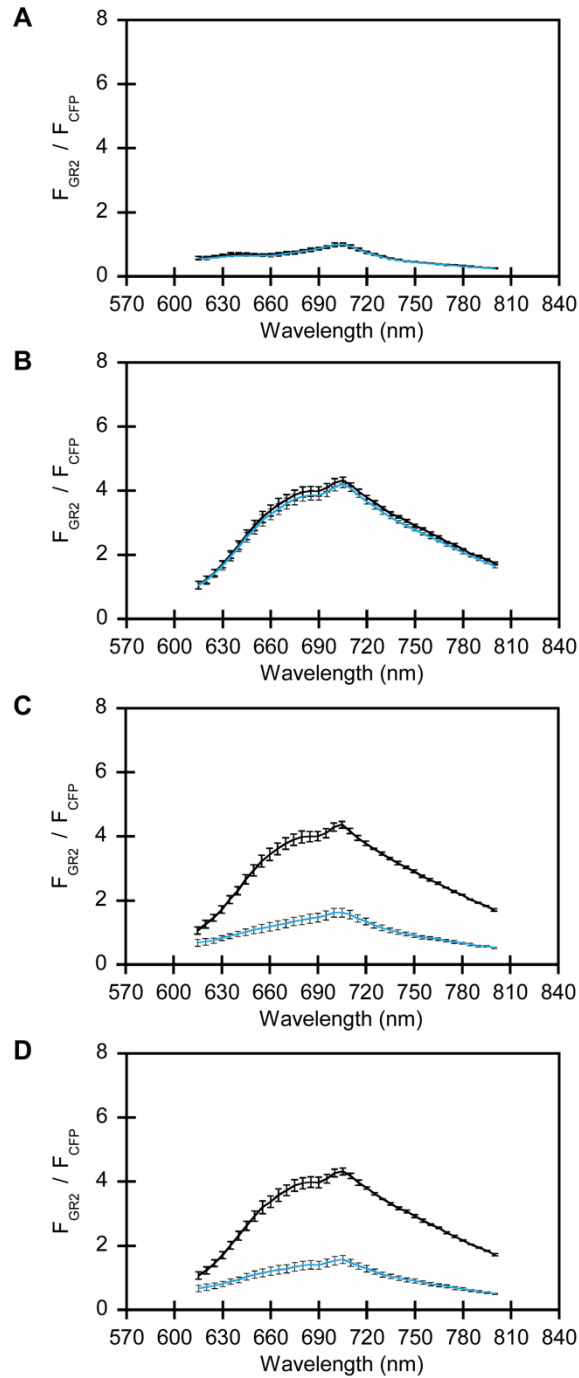

**Figure S16.** Normalized emission spectra of GR2-CFP in *E. coli* treated first in the presence of buffer only (control) or 400 mM sodium chloride (black) in 50 mM sodium acetate buffer at pH 5, followed by washing with (A) buffer only for the control sample, and (B) 400 mM sodium chloride, (C) buffer, or (D) 400 mM sodium gluconate for the samples treated with sodium chloride (blue) for Figure 4B. For the rhodopsin, excitation was provided at 570 nm, and the emission was collected from 615–800 nm. For CFP, the excitation was provided at 390 nm, and the emission was collected from 425–560 nm. The emission spectra of GR2 at each point were normalized by the CFP emission intensity at 485 nm ( $F_{\text{CFP}}$ ). The average of nine biological replicates from three technical replicates with standard error of the mean is shown.

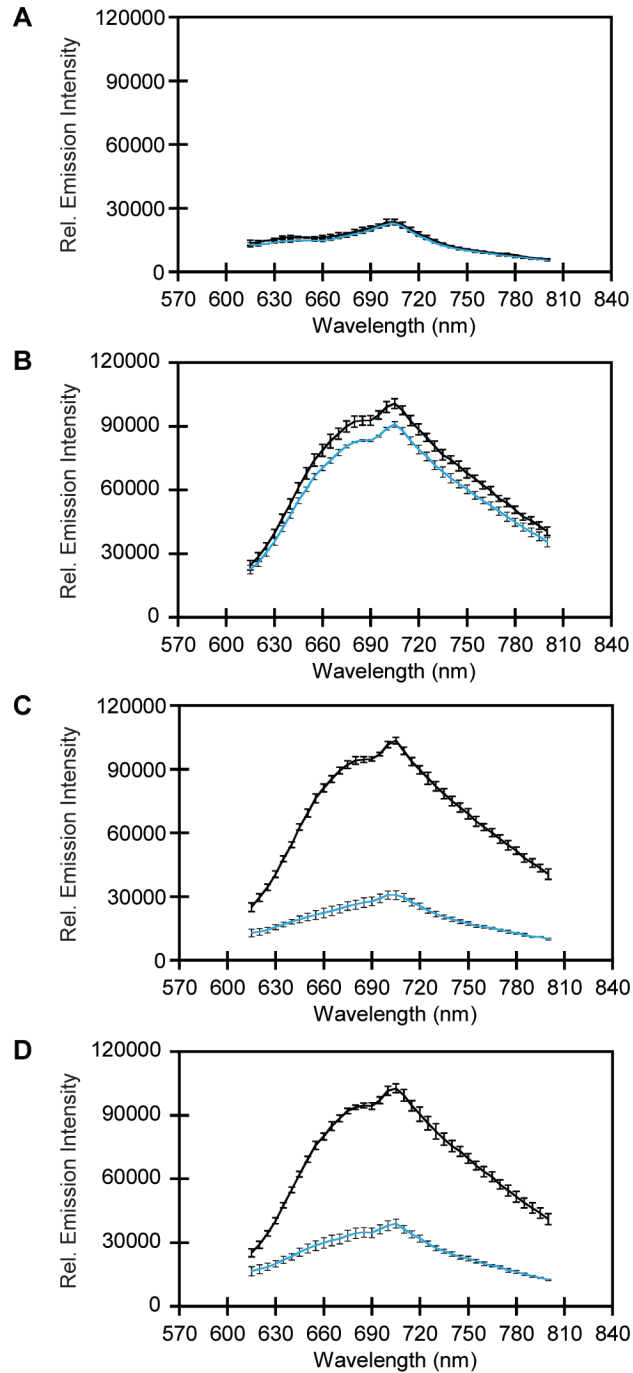

**Figure S17.** Emission spectra of GR2 for GR2-CFP in *E. coli* treated first in the presence of buffer only (control) or 400 mM sodium chloride (black), followed by washing with (A) buffer only for the control sample, and (B) 400 mM sodium chloride, (C) buffer, or (D) 400 mM sodium gluconate for the samples treated with sodium chloride (blue) from Figure S16.

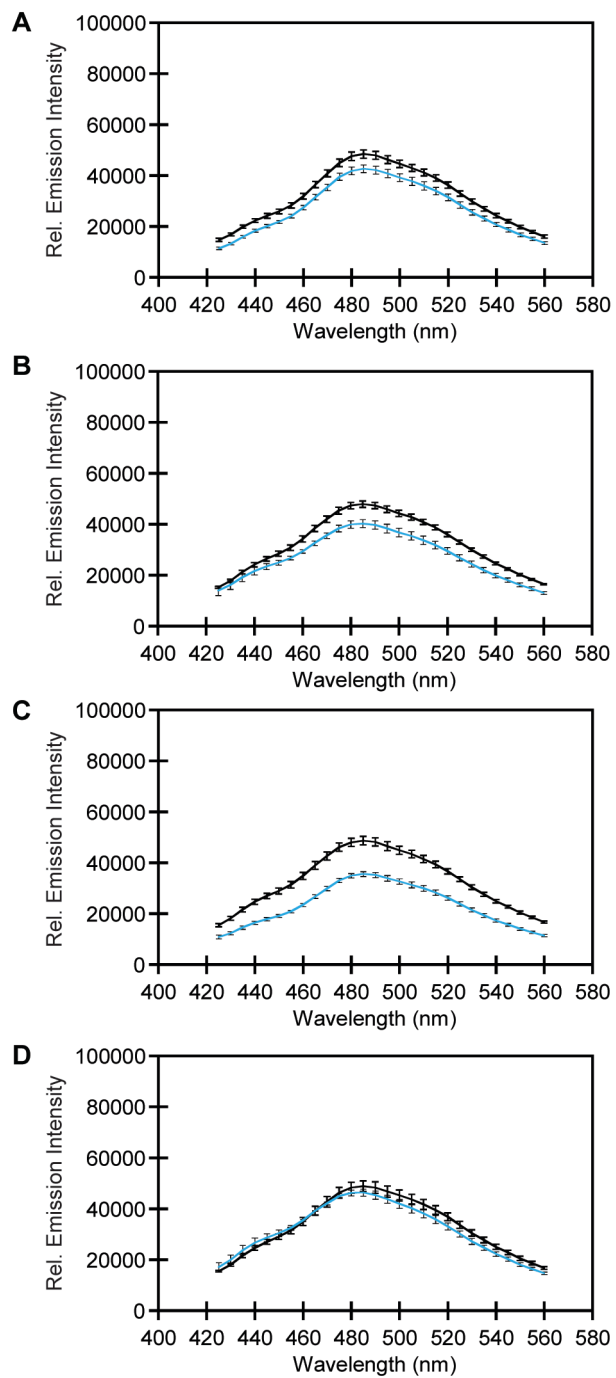

**Figure S18.** Emission spectra of CFP for GR2-CFP in *E. coli* treated first with buffer only (control) or 400 mM sodium chloride (black), followed by washing with (A) buffer only for the control sample, and (B) 400 mM sodium chloride, (C) buffer, or (D) 400 mM sodium gluconate for the samples treated with sodium chloride (blue) from Figure S16.

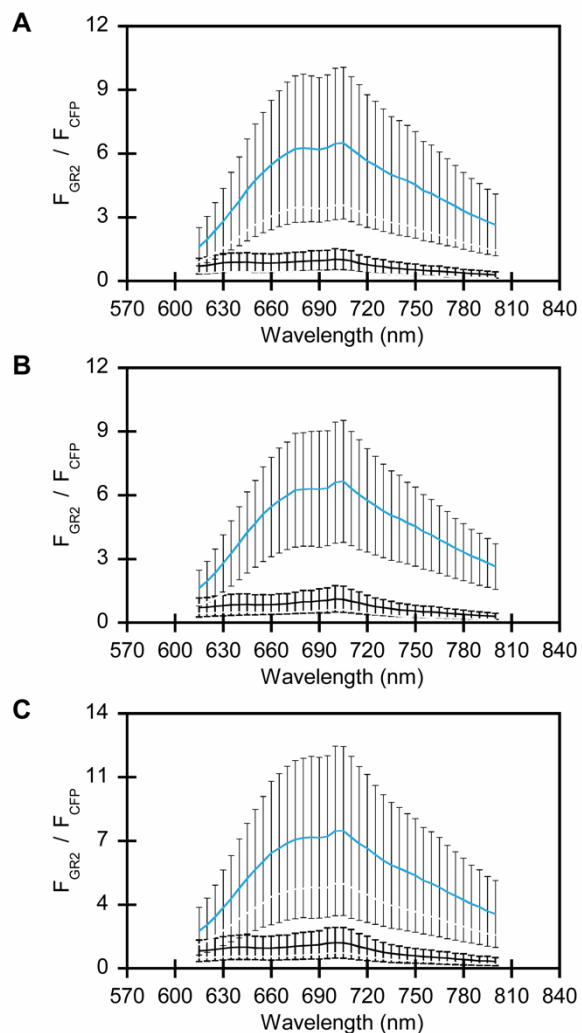

**Figure S19.** Normalized emission spectra of GR2-CFP in *E. coli* pre-treated with (A) 50 mM sodium acetate buffer at pH 5, (B) 0.3% DMSO, or (C) 30  $\mu$ M CCCP with 0 (black) and 400 (blue) mM sodium chloride from Figure 4C. For the rhodopsin, excitation was provided at 570 nm, and the emission was collected from 615–800 nm. For CFP, excitation was provided at 390 nm, and the emission was collected from 425–560 nm. The emission spectra of GR2 at each point were normalized by the CFP emission intensity at 485 nm ( $F_{\text{CFP}}$ ). The average of nine biological replicates from three technical replicates with standard error of the mean is shown.

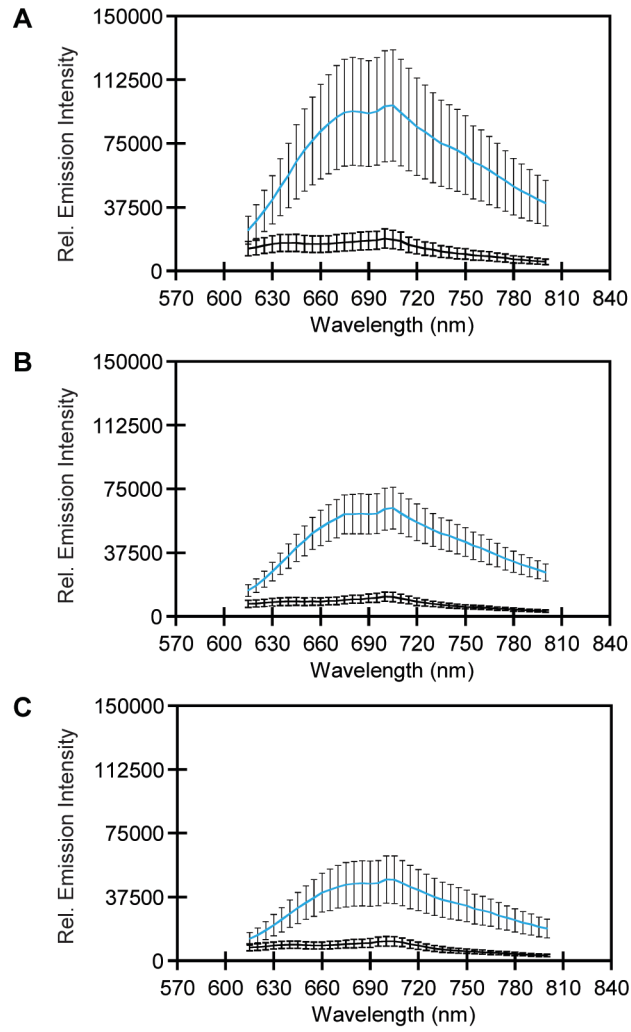

**Figure S20.** Emission spectra of GR2 for GR2-CFP in *E. coli* pre-treated with (A) 50 mM sodium acetate buffer at pH 5, (B) 0.3% DMSO, or (C) 30  $\mu$ M CCCP with 0 (black) and 400 (blue) mM sodium chloride from Figure S19.



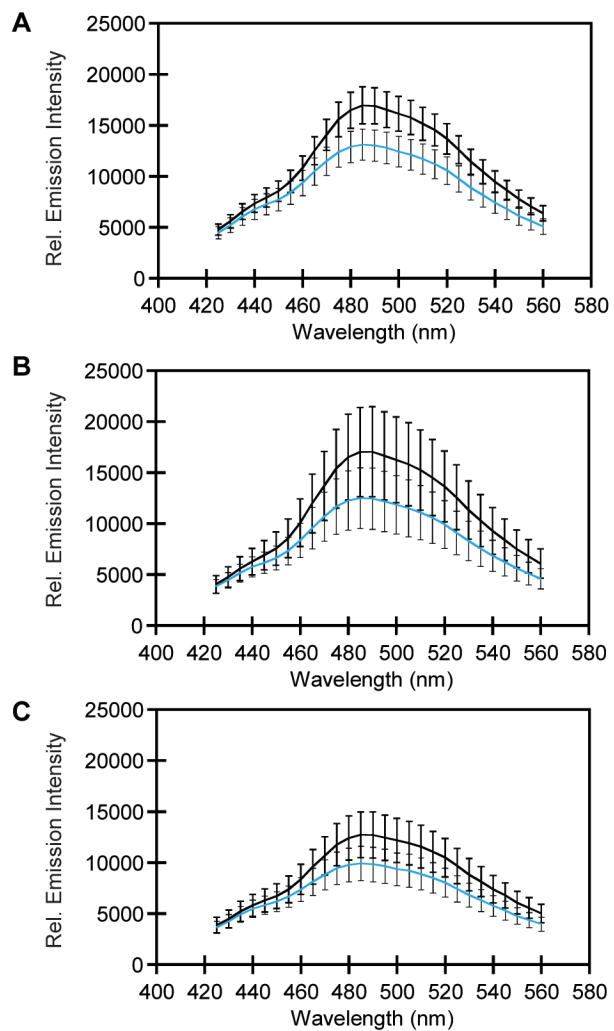

**Figure S21.** Emission spectra of CFP for GR2-CFP in *E. coli* pre-treated with (A) 50 mM sodium acetate buffer at pH 5, (B) 0.3% DMSO or (C) 30  $\mu$ M CCCP with 0 (black) and 400 (blue) mM sodium chloride from Figure S19.

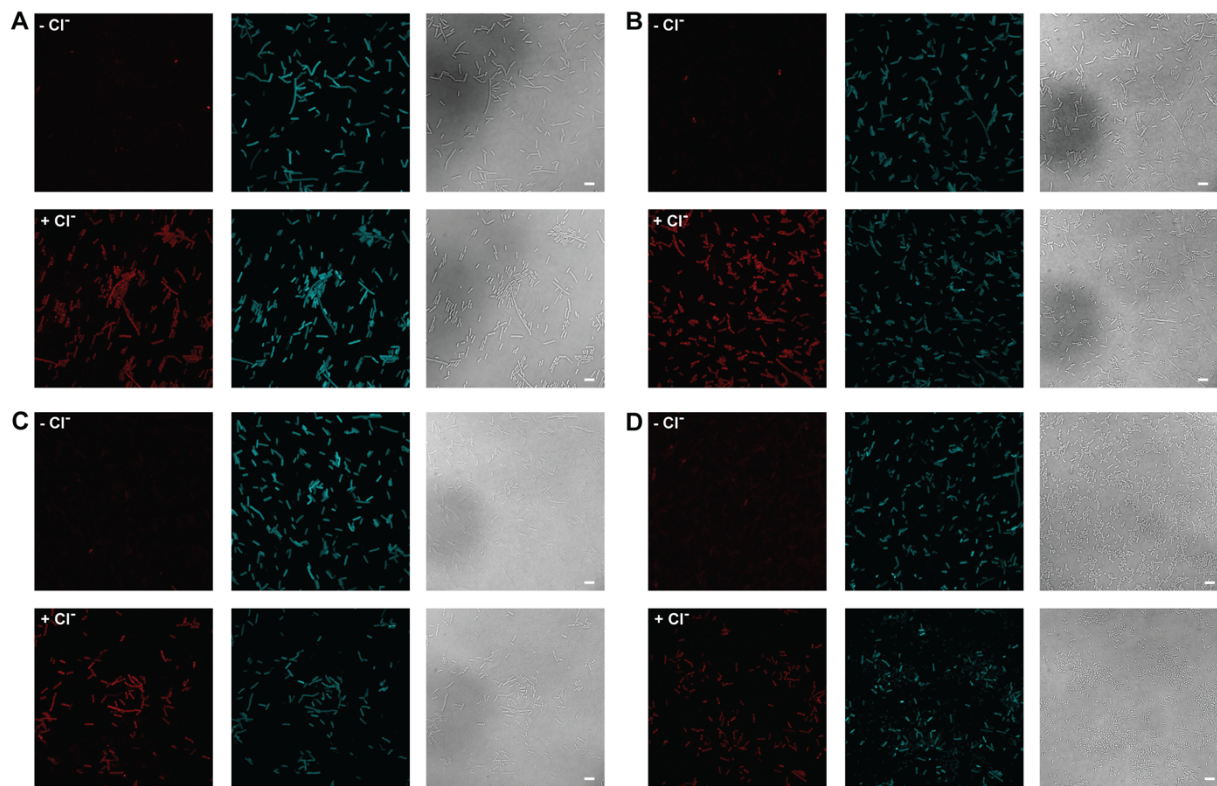

**Figure S22.** Representative confocal fluorescence microscopy images from four different biological replicates (A–D) are shown for *E. coli* expressing GR2-CFP on agarose pads with 0 mM and 400 mM sodium chloride in 50 mM acetate buffer at pH 5. At least five fields were imaged for each biological replicate. In each panel, the emission from GR2 (red) is on the left, emission from CFP (cyan) is in the middle, and differential interference contrast (DIC) image is on the right (scale bar = 5  $\mu$ m). Analysis is shown in Figure 5 and Figure S23.

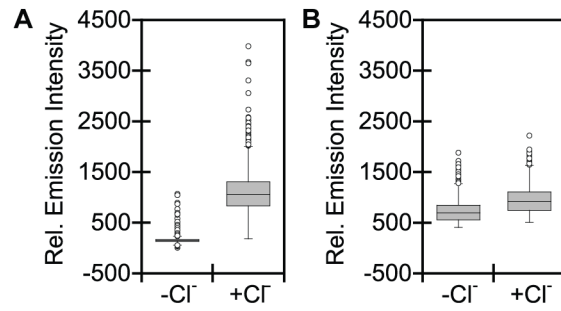

**Figure S23.** Boxplots show the emission response of (A) GR2 and (B) CFP for each cell analyzed from four biological replicates ( $n = 3,352$  regions of interest (ROIs) for 0 mM sodium chloride;  $n = 3,062$  ROIs for 400 mM sodium chloride). The gray boxes correspond to the lower and upper quartile data with the minimum and maximum values extending below and above the box. The median values are indicated by the black lines in the gray boxes, and outliers are shown as open circles.

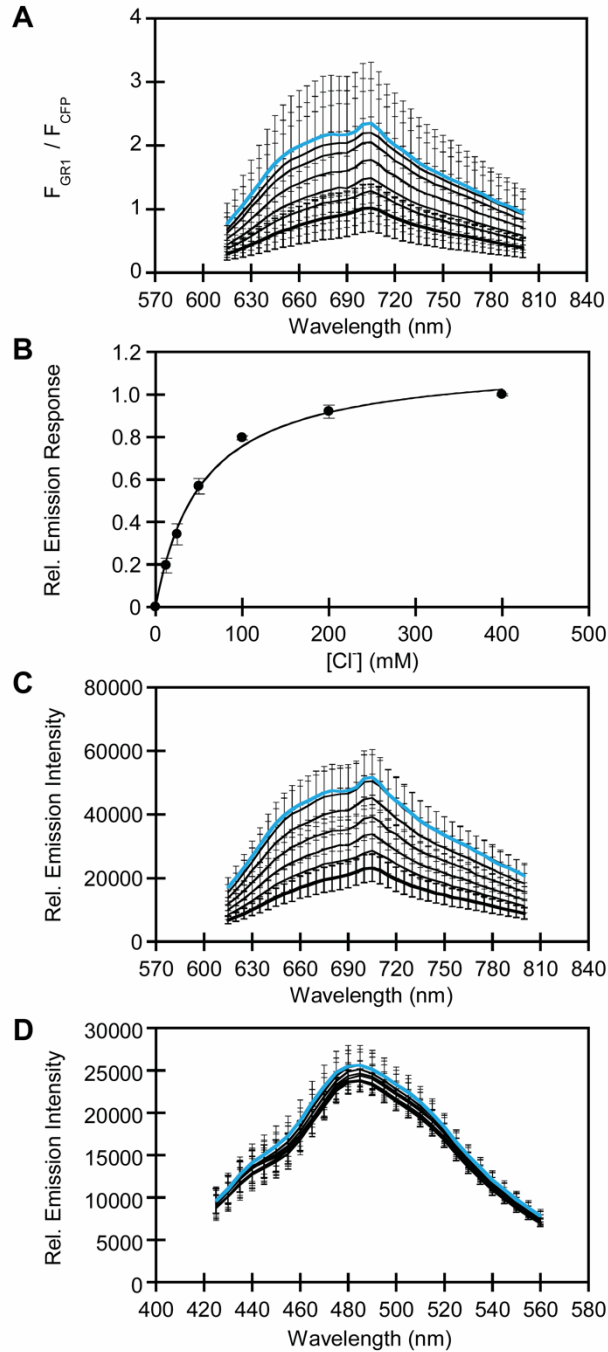

**Figure S24.** (A) Normalized emission spectra of GR1-CFP in *E. coli* treated with 0 (black and bold), 12.5, 25, 50, 100, 200, and 400 mM (blue) sodium chloride in 50 mM sodium acetate buffer at pH 5. (B) Normalized integrated emission response ( $F_{GR1}/F_{CFP}$ ) from A to determine the  $K_d$ . The  $K_d$  for Cl<sup>-</sup> is  $54 \pm 9$  mM. (C) Emission spectra of GR1 from A. (D) Emission spectra of CFP from A. For the rhodopsin, excitation was provided at 570 nm, and the emission was collected and integrated from 615–800 nm ( $F_{GR1}$ ). For CFP, the excitation was provided at 390 nm, and the emission was collected from 425–560 nm ( $F_{CFP}$ ). The emission spectra of GR1 at each point were normalized by the CFP emission intensity at 485 nm ( $F_{CFP}$ ). The average of nine biological replicates from three technical replicates with standard error of the mean is shown.

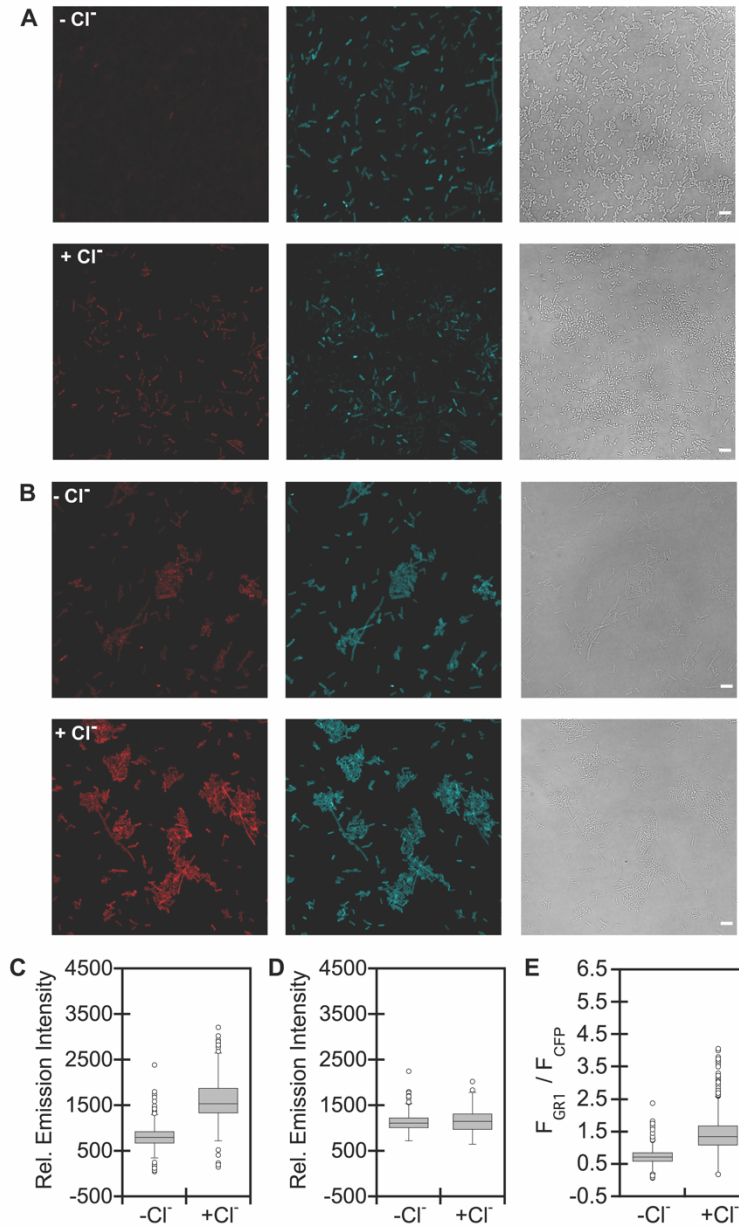

**Figure S25.** Comparison of (A) panel D from Figure S22 for GR2-CFP with (B) representative confocal fluorescence microscopy images of *E. coli* expressing GR1-CFP on agarose pads with 0 mM and 400 mM sodium chloride in 50 mM acetate buffer at pH 5. For GR1-CFP, at least five fields were imaged for one biological replicate. In each panel, the emission from GR1 (red) is on the left, emission from CFP (cyan) is in the middle, and differential interference contrast (DIC) image is on the right (scale bar = 5 μm). Boxplots show the emission response of (C) GR1, (D) CFP, and (E) the normalized emission response ( $F_{GR1}/F_{CFP}$ ) for each cell analyzed from one biological replicate ( $n = 437$  ROIs for 0 mM sodium chloride;  $n = 472$  ROIs for 400 mM sodium chloride). The gray boxes correspond to the lower and upper quartile data with the minimum and maximum values extending below and above the box. The median values are indicated by the black lines in the gray boxes, and outliers are shown as open circles.

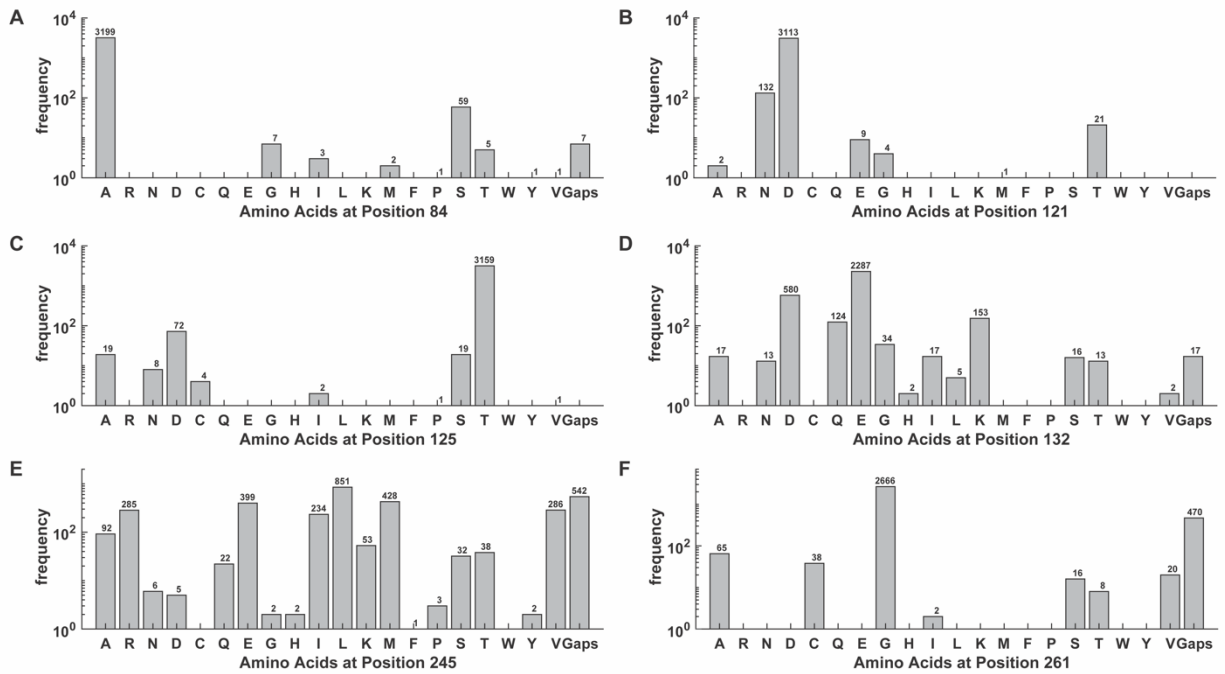

**Figure S26.** Composition of amino acids at each position along the proton-pumping pathway for all proteins in the rhodopsin family. The amino acid is shown on the x-axis with the number of proteins on the y-axis. If there is no amino acid at a given position in the alignment, it is defined as a gap.

## References

1. McWilliam, H.; Li, W.; Uludag, M.; Squizzato, S.; Park, Y. M.; Buso, N.; Cowley, A. P.; Lopez, R. Analysis Tool Web Services from the EMBL-EBI. *Nucleic Acids Res.* **2013**, *41*, W597–600.
